# Supplementary material for: Theoretical investigation of carbon dioxide adsorption on MgH2 with a cobalt catalyst
Source: Royal Society of Chemistry journal article supplement (doi:10.1039/d3im00096f), 2024-01-01
Supplement: d3im00096f1.pdf [file d3im00096f1.pdf]

## Supplementary Information

### Theoretical Investigation of Carbon Dioxide on MgH<sub>2</sub> with Cobalt Catalyst

Sara Rozas,<sup>a</sup> Fabiana C. Gennari,<sup>b</sup> Mert Atilhan,<sup>c</sup> Alfredo Bol<sup>d,e</sup> Santiago Aparicio<sup>a,e\*</sup>

<sup>a</sup> Department of Chemistry, University of Burgos, 09001 Burgos, Spain

<sup>b</sup> National Scientific and Technical Research Council (CONICET), Bariloche Atomic Centre (CNEA),  
R8402AGP, S. C. de Bariloche, Río Negro, Argentina

<sup>c</sup> Department of Chemical and Paper Engineering, Western Michigan University, Kalamazoo MI 49008-  
5462, USA

<sup>d</sup> Department of Physics, University of Burgos, 09001 Burgos, Spain

<sup>e</sup> International Research Center in Critical Raw Materials for Advanced Industrial Technologies (ICCRAM),  
University of Burgos, 09001 Burgos, Spain

\*Corresponding author: [sapar@ubu.es](mailto:sapar@ubu.es) (S.A.)

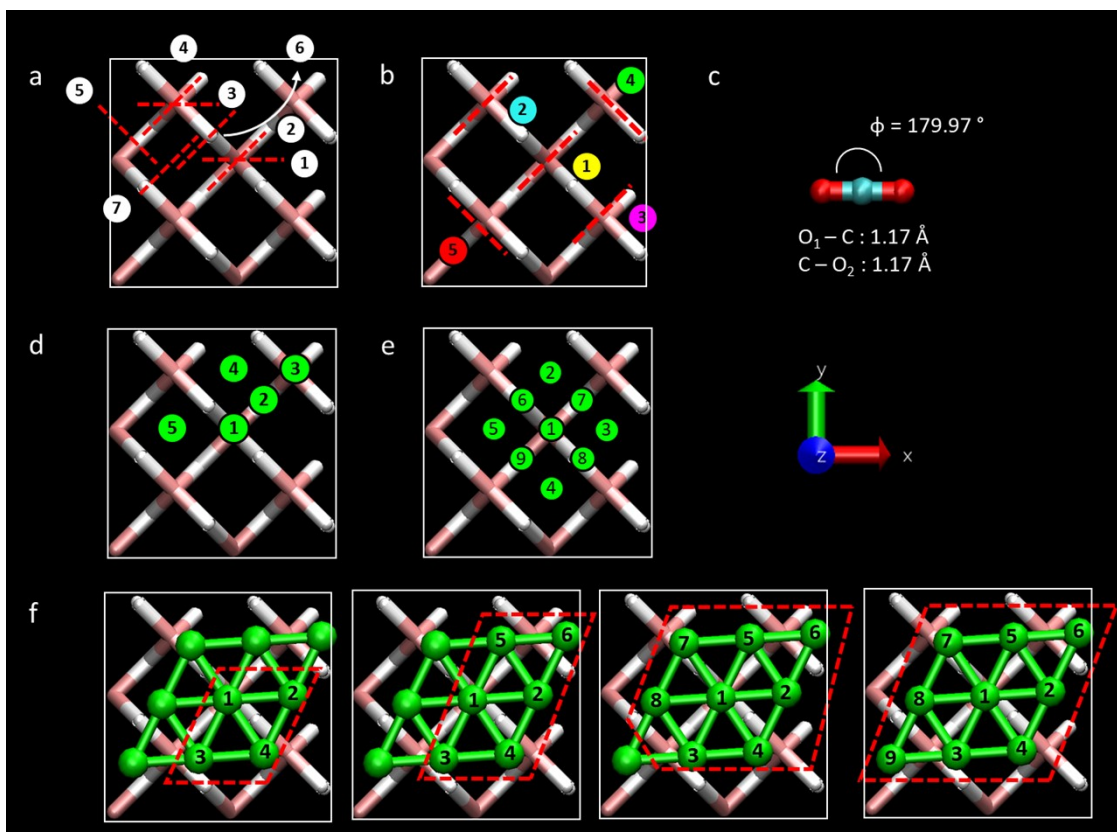

**Fig. S1.** Initial arrangement of the seven considered sites for the CO<sub>2</sub> molecule adsorption (a); the 1 to 5 CO<sub>2</sub> molecules considered adsorption sites (b); the isolated CO<sub>2</sub> molecule properties after optimization (c); the Co SAC studied sites (d); the Co clusterization atoms sites and order (e); and the Co layer growing disposition (f) on the MgH<sub>2</sub> clean slab. Atom color code: (white) hydrogen, (pink) magnesium, (green) cobalt.

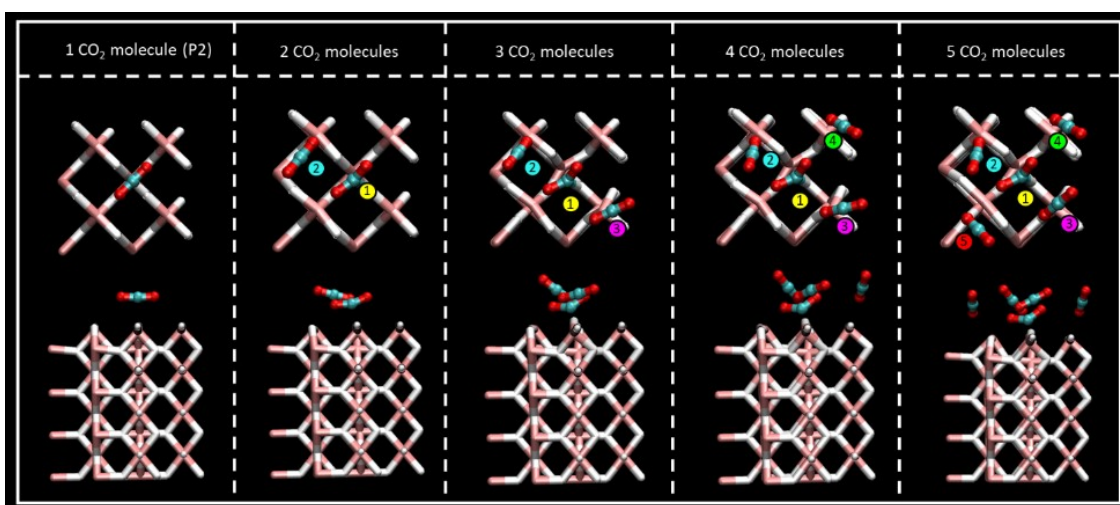

**Fig. S2.** Top- and side-view of the 1 to 5 CO<sub>2</sub> adsorption structures. Atom color code: (white) hydrogen, (pink) magnesium, (red) oxygen, (blue) carbon.

**Table S1.** MgH<sub>2</sub> first layer bond distances (Å) and angles (deg.) deformation after geometric optimization for the most stable studied structures.

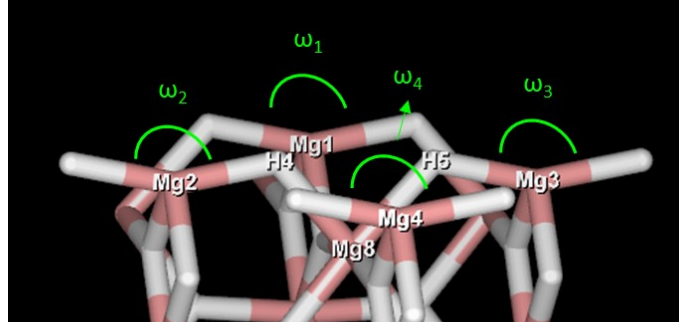

| System                                  | $\omega$ / degree |            |            |            | $r$ / Å     |              |              |              |              |              |              |              |              |
|-----------------------------------------|-------------------|------------|------------|------------|-------------|--------------|--------------|--------------|--------------|--------------|--------------|--------------|--------------|
|                                         | $\omega_1$        | $\omega_2$ | $\omega_3$ | $\omega_4$ | $r_{H4-H5}$ | $r_{H4-Mg2}$ | $r_{H5-Mg3}$ | $r_{H4-Mg8}$ | $r_{H5-Mg8}$ | $r_{H4-Mg1}$ | $r_{H5-Mg1}$ | $r_{H4-Mg4}$ | $r_{H5-Mg4}$ |
| MgH <sub>2</sub> Slab                   |                   |            | 157.78     |            | 2.70        | 1.82         | 1.82         | 2.02         | 2.02         | 3.44         | 3.44         | 3.44         | 3.44         |
| CO <sub>2</sub> P2                      | 159.78            | 157.06     | 156.97     | 159.53     | 2.67        | 1.82         | 1.82         | 2.03         | 2.04         | 3.36         | 3.39         | 3.39         | 3.35         |
| CO <sub>2</sub> P7                      | 156.42            | 157.09     | 163.08     | 156.41     | 2.62        | 1.81         | 1.82         | 2.02         | 1.96         | 3.42         | 3.49         | 3.36         | 3.26         |
| 4 CO <sub>2</sub>                       | 160.46            | 149.94     | 174.35     | 168.26     | 2.62        | 2.31         | 1.81         | 2.70         | 1.82         | 3.02         | 3.35         | 3.35         | 2.91         |
| Co SAC / C2                             | 157.78            | 133.91     | 132.37     | 159.04     | 3.10        | 1.86         | 1.86         | 3.15         | 3.21         | 3.46         | 3.56         | 3.49         | 3.42         |
| Co SAC / C1                             | 164.15            | 158.00     | 160.82     | 163.94     | 2.41        | 1.90         | 1.84         | 2.11         | 2.11         | 3.21         | 3.23         | 3.23         | 3.22         |
| 7 Co                                    | 128.04            | 123.71     | 147.37     | 157.59     | 2.77        | 2.05         | 2.51         | 2.36         | 2.31         | 4.38         | 2.68         | 2.71         | 4.04         |
| 4/4 Co                                  | 108.90            | 140.01     | 133.06     | 122.26     | 2.13        | 2.18         | 2.05         | 2.22         | 2.24         | 3.45         | 3.62         | 3.70         | 3.25         |
| C3 CO <sub>2</sub> II                   | 147.95            | 153.42     | 151.27     | 49.84      | 2.53        | 1.83         | 1.93         | 2.08         | 2.08         | 2.24         | 3.32         | 5.03         | 3.99         |
| 2 Co CO <sub>2</sub> II                 | 162.23            | 157.13     | 168.92     | 149.47     | 2.49        | 1.95         | 2.13         | 2.28         | 2.05         | 3.60         | 2.95         | 2.90         | 3.74         |
| C2 CO <sub>2</sub> + 4 H <sub>2</sub>   | 169.00            | 156.71     | 154.22     | 157.53     | 2.38        | 2.71         | 1.84         | 2.12         | 2.44         | 4.10         | 3.80         | 2.38         | 2.26         |
| 2 Co CO <sub>2</sub> + 4 H <sub>2</sub> | 160.91            | 160.61     | 158.65     | 161.06     | 2.31        | 2.09         | 1.98         | 2.24         | 1.94         | 3.30         | 3.25         | 3.03         | 3.41         |

**Table S2** Adsorption energy (per atom) for n Co atoms clusterization (1 to 9 atoms) on MgH<sub>2</sub> surface. The value for the configuration with the highest energy (7 Co) is reported in bold.

| Cluster Co  | $E_{ads}$ (eV) |
|-------------|----------------|
| 1 Co        | -7.93          |
| 2 Co        | -8.16          |
| 3 Co        | -9.70          |
| 4 Co        | -9.43          |
| 5 Co        | -3.09          |
| 6 Co        | -5.24          |
| <b>7 Co</b> | <b>-10.55</b>  |
| 8 Co        | -8.75          |
| 9 Co        | -8.80          |

**Table S3** Adsorption energy (per atom) for n Co atoms MgH<sub>2</sub> surface coverage (1/4 to 4/4 coverage). The value for the configuration with the highest energy (4/4 Co coverage) is reported in bold.

| Layer Co   | $E_{ads}$ (eV) |
|------------|----------------|
| 1/4        | -7.18          |
| 2/4        | -7.78          |
| 3/4        | -8.98          |
| <b>4/4</b> | <b>-9.43</b>   |



**Table S5.** Interatomic distances in Å, between cobalt atoms of the 1/4 to 4/4 coverage layer of Co structures. Numbers indicate Co atom number, as well as the addition order, where 1/4 coverage corresponds to 1-4 atoms, 2/4 coverage to 1-6 atoms, 3/4 coverage to 1-8 atoms and 4/4 coverage to 1-9 atoms. Atom color code: (white) hydrogen, (pink) magnesium, (green) cobalt.

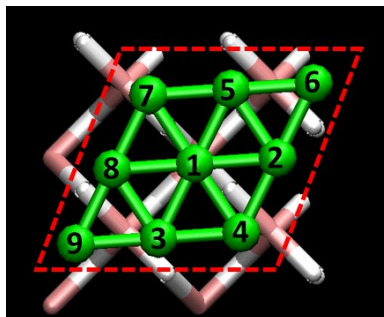

| $r_{\text{Co-Co}} / \text{Å}$ | Co cluster       |                  |                  |                  |
|-------------------------------|------------------|------------------|------------------|------------------|
|                               | $\frac{1}{4}$ Co | $\frac{2}{4}$ Co | $\frac{3}{4}$ Co | $\frac{4}{4}$ Co |
| $r_{1-2}$                     | 2.40             | 2.31             | 2.41             | 2.29             |
| $r_{1-3}$                     | 2.32             | 2.32             | 2.83             | 2.28             |
| $r_{1-4}$                     | 2.20             | 2.43             | 2.21             | 2.81             |
| $r_{1-5}$                     | -                | 2.32             | 2.56             | 2.41             |
| $r_{1-7}$                     | -                | -                | 2.25             | 2.61             |
| $r_{1-8}$                     | -                | -                | 2.27             | 2.27             |
| $r_{2-4}$                     | 2.27             | 2.16             | 2.30             | 2.45             |
| $r_{2-5}$                     | -                | 2.26             | 2.30             | 2.31             |
| $r_{2-6}$                     | -                | 2.19             | 2.24             | 4.15             |
| $r_{3-4}$                     | 2.28             | 2.20             | 2.26             | 2.38             |
| $r_{3-8}$                     | -                | -                | 4.03             | 3.05             |
| $r_{3-9}$                     | -                | -                | -                | 2.17             |
| $r_{5-7}$                     | -                | -                | 2.34             | 2.64             |
| $r_{7-8}$                     | -                | -                | 2.21             | 2.60             |
| $r_{8-9}$                     | -                | -                | -                | 2.26             |

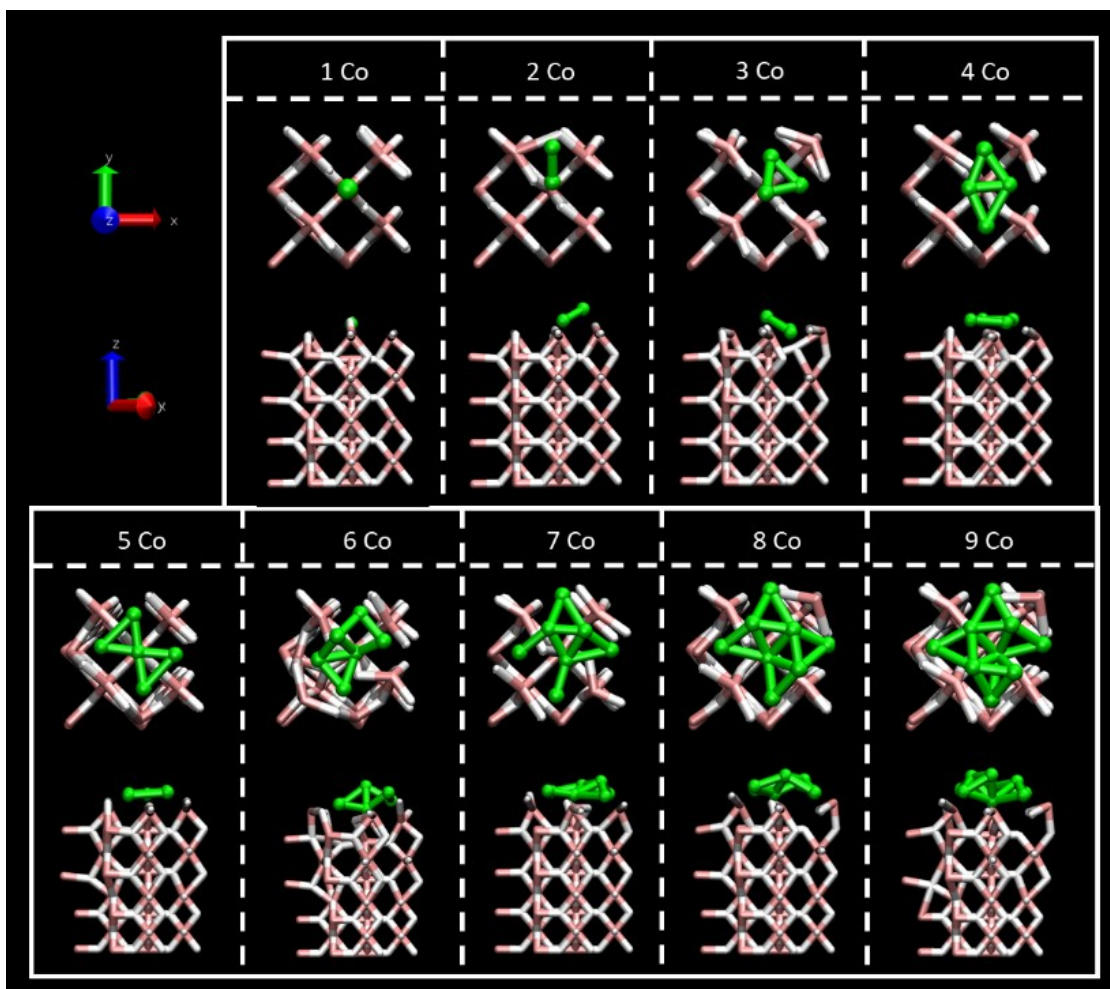

**Fig. S3.** Top- and side-view of the Co clusterization (1 to 9 atoms) structures. Atom color code: (white) hydrogen, (pink) magnesium, (green) cobalt.

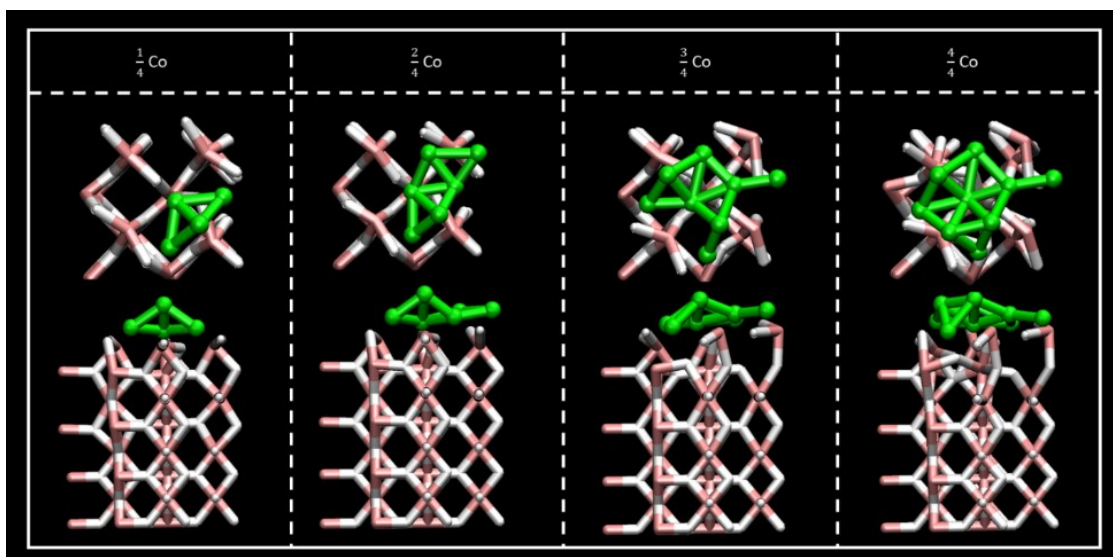

**Fig. S4.** Top- and side-view of the Co coverage ( $1/4$  to  $4/4$  slab coverage) structures. Atom color code: (white) hydrogen, (pink) magnesium, (green) cobalt.

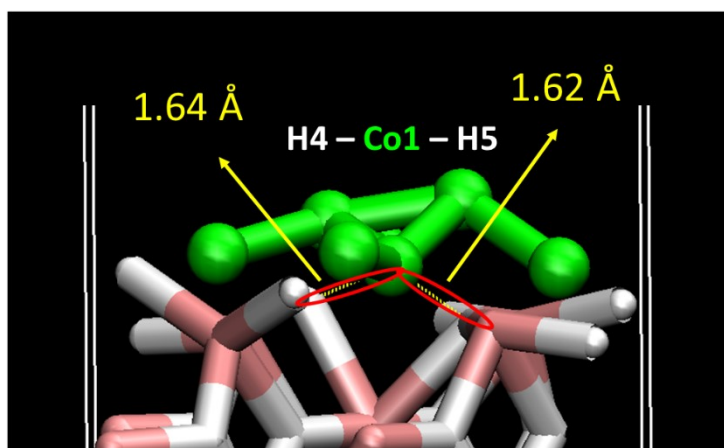

**Fig. S5.** Detail of the of the geometric parameters related to 7 Co on  $\text{MgH}_2$  structure.



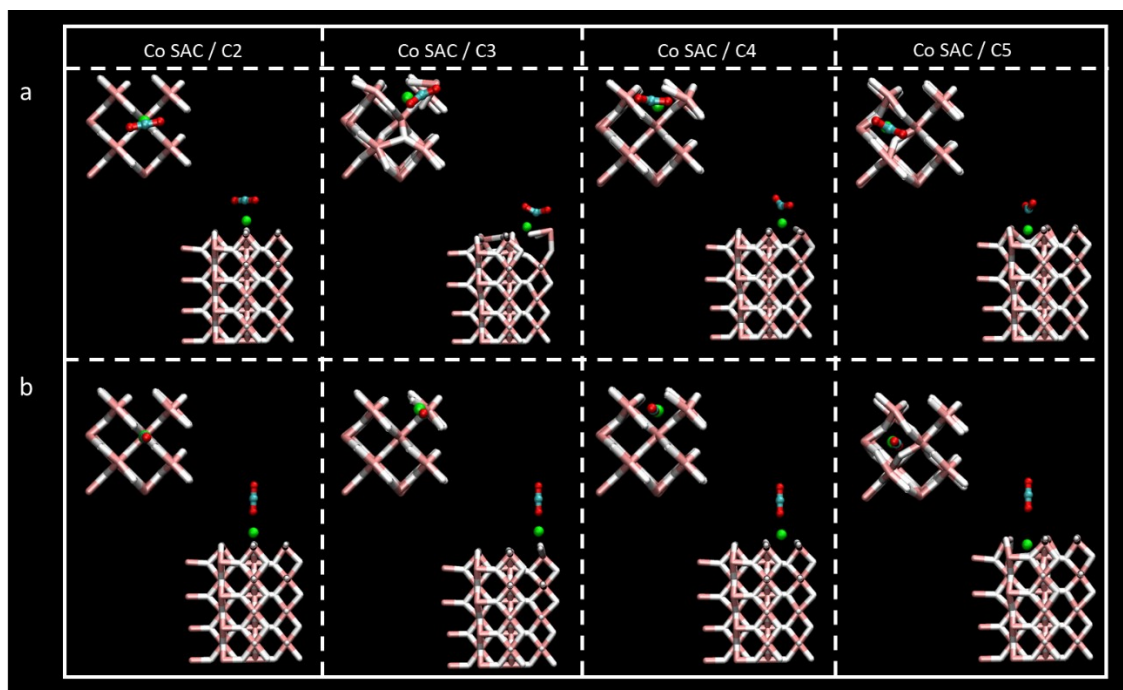

**Fig. S6.** Top- and side-view of the CO<sub>2</sub> adsorption on Co SAC structures for the C2 – C5 sites and considering parallel (a) and perpendicular (b) CO<sub>2</sub> orientation with respect to slab surface. Atom color code: (white) hydrogen, (pink) magnesium, (green) cobalt, (red) oxygen, (blue) carbon.

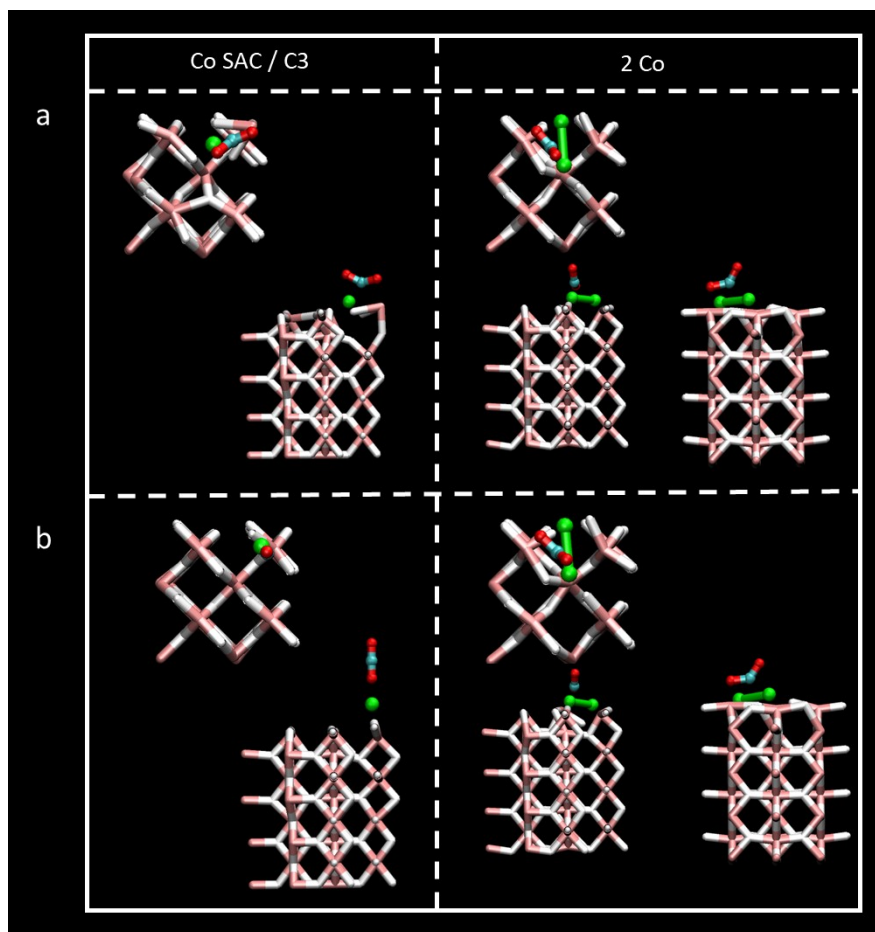

**Fig. S7.** Top- and -side view of the CO<sub>2</sub> adsorption on C3 Co SAC and 2 Co doped structures considering parallel (a) and perpendicular (b) CO<sub>2</sub> disposition with respect to slab surface. Atom color code: (white) hydrogen, (pink) magnesium, (green) cobalt, (red) oxygen, (blue) carbon.

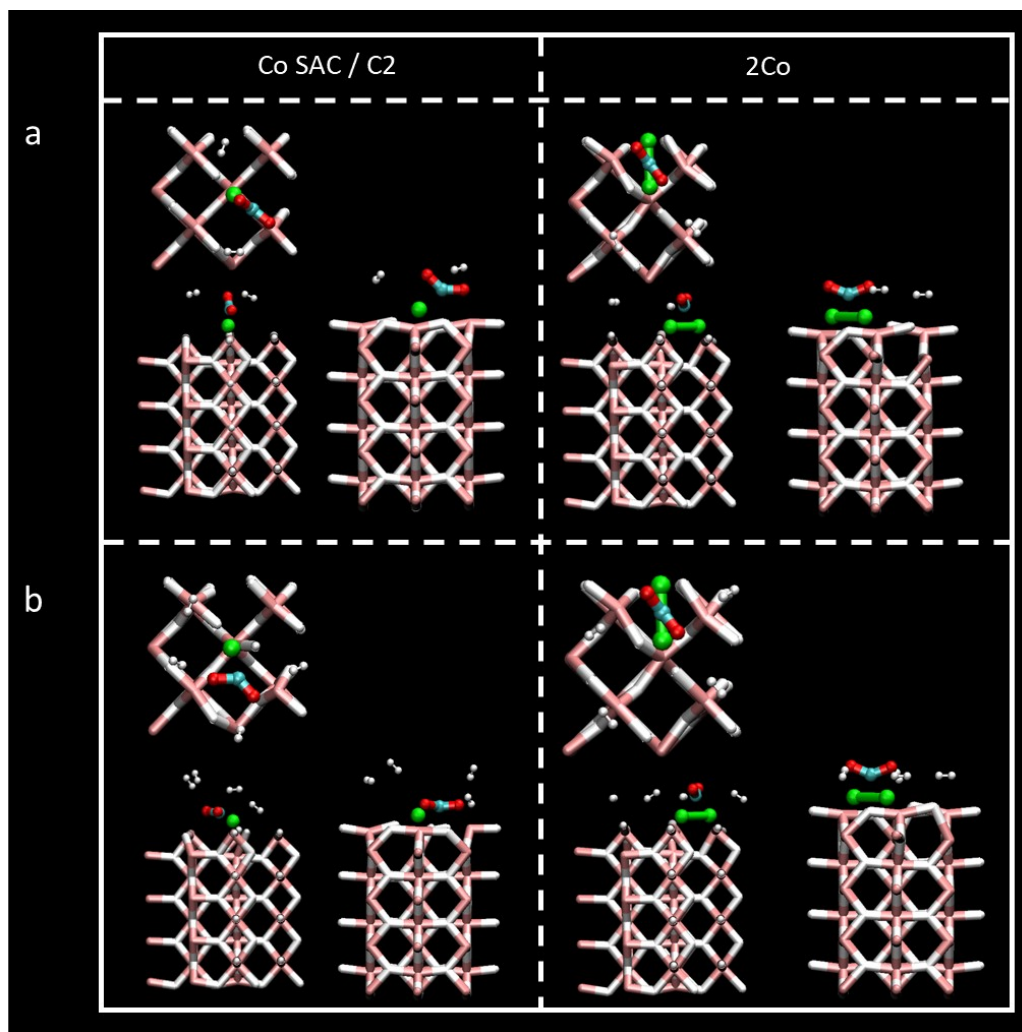

**Fig. S8.** Top- and -side view of 1 CO<sub>2</sub> + 2 (a) and 4 (b) H<sub>2</sub> adsorption on C2 Co SAC and 2 Co doped structures. Atom color code: (white) hydrogen, (pink) magnesium, (green) cobalt, (red) oxygen, (blue) carbon.

Table S6. Bader ionic charges for CO<sub>2</sub> (C<sub>1</sub>, O<sub>1</sub> and O<sub>2</sub>) and surface (first and second MgH<sub>2</sub> layer, H<sub>1</sub> – H<sub>8</sub> and Mg<sub>1</sub> – Mg<sub>8</sub>) atoms after CO<sub>2</sub> adsorption on MgH<sub>2</sub> for configuration P2, P7 and 4 CO<sub>2</sub>.

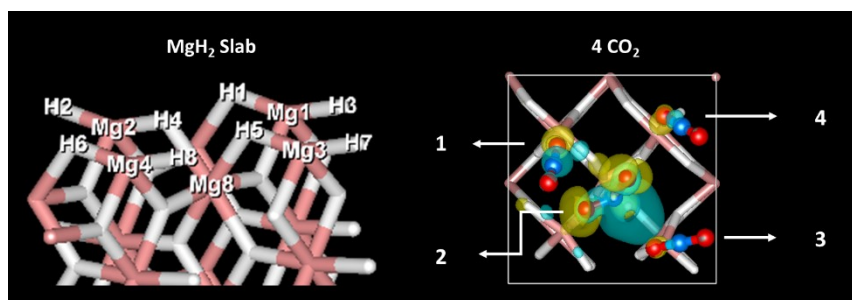

| Atom                                | MgH <sub>2</sub> Slab | CO <sub>2</sub> | 1 CO <sub>2</sub> P2 | 1 CO <sub>2</sub> P7 | 4 CO <sub>2</sub> |       |
|-------------------------------------|-----------------------|-----------------|----------------------|----------------------|-------------------|-------|
| <b>Ionic charges</b>                |                       |                 |                      |                      |                   |       |
| First layer<br>(MgH <sub>2</sub> )  | H <sub>1</sub>        | -0.76           | -                    | -0.76                | -0.76             | -0.74 |
|                                     | H <sub>2</sub>        | -0.75           | -                    | -0.76                | -0.76             | -0.74 |
|                                     | Mg <sub>1</sub>       | +1.55           | -                    | +1.56                | +1.53             | +1.60 |
|                                     | Mg <sub>2</sub>       | +1.55           | -                    | +1.55                | +1.54             | +1.57 |
|                                     | H <sub>3</sub>        | -0.78           | -                    | -0.76                | -0.75             | -0.76 |
|                                     | H <sub>4</sub>        | -0.76           | -                    | -0.74                | -0.76             | -0.16 |
|                                     | H <sub>5</sub>        | -0.76           | -                    | -0.75                | -0.76             | -0.74 |
|                                     | H <sub>6</sub>        | -0.76           | -                    | -0.76                | -0.75             | -0.74 |
|                                     | Mg <sub>3</sub>       | +1.55           | -                    | +1.55                | +1.57             | +1.59 |
|                                     | Mg <sub>4</sub>       | +1.55           | -                    | +1.56                | +1.54             | +1.58 |
|                                     | H <sub>7</sub>        | -0.75           | -                    | -0.76                | -0.76             | -0.75 |
|                                     | H <sub>8</sub>        | -0.76           | -                    | -0.76                | -0.76             | -0.74 |
| Second layer<br>(MgH <sub>2</sub> ) | Mg <sub>8</sub>       | +1.56           | -                    | +1.57                | +1.57             | +1.58 |
| CO <sub>2</sub>                     | O <sub>1</sub> (1)    | -               | +0.22                | -1.02                | -1.07             | -1.07 |
|                                     | O <sub>2</sub> (1)    | -               | +0.22                | -0.99                | -1.01             | -0.95 |
|                                     | C <sub>1</sub> (1)    | -               | -0.44                | +1.95                | +2.11             | +1.98 |
|                                     | O <sub>1</sub> (2)    | -               | -                    | -                    | -                 | -1.12 |
|                                     | O <sub>2</sub> (2)    | -               | -                    | -                    | -                 | -1.22 |
|                                     | C <sub>1</sub> (2)    | -               | -                    | -                    | -                 | +1.56 |
|                                     | O <sub>1</sub> (3)    | -               | -                    | -                    | -                 | -1.01 |
|                                     | O <sub>2</sub> (3)    | -               | -                    | -                    | -                 | -1.10 |
|                                     | C <sub>1</sub> (3)    | -               | -                    | -                    | -                 | +2.07 |
|                                     | O <sub>1</sub> (4)    | -               | -                    | -                    | -                 | -1.02 |
|                                     | O <sub>2</sub> (4)    | -               | -                    | -                    | -                 | -1.07 |
|                                     | C <sub>1</sub> (4)    | -               | -                    | -                    | -                 | +2.05 |

Table S7. Bader ionic charges for Co (Co<sub>1</sub> - Co<sub>9</sub>) and surface (first and second MgH<sub>2</sub> layer, H<sub>1</sub> - H<sub>8</sub> and Mg<sub>1</sub> - Mg<sub>8</sub>) atoms after Co adsorption in configuration C2, 4/4 Co and 7 Co.

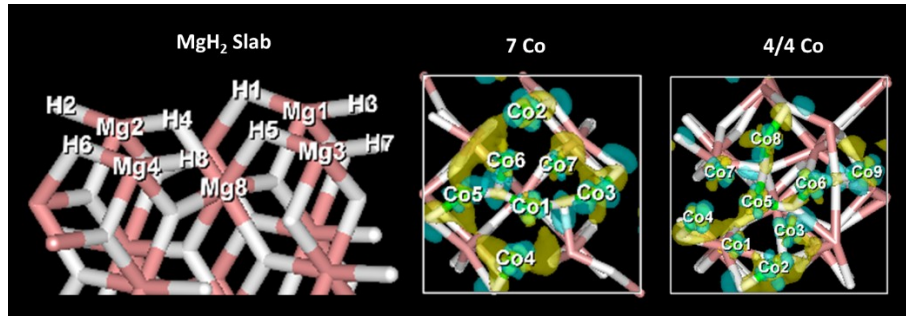

|                                     | MgH <sub>2</sub> Slab | Co    | 1 Co C2                  | 4/4 Co | 7 Co  |       |
|-------------------------------------|-----------------------|-------|--------------------------|--------|-------|-------|
|                                     | Ionic charge          |       |                          |        |       |       |
| First layer<br>(MgH <sub>2</sub> )  | H <sub>1</sub>        | -0.76 | -                        | -0.76  | -0.43 | -0.50 |
|                                     | H <sub>2</sub>        | -0.75 | -                        | -0.76  | -0.80 | -0.77 |
|                                     | Mg <sub>1</sub>       | +1.55 | -                        | +1.52  | +1.52 | +1.49 |
|                                     | Mg <sub>2</sub>       | +1.55 | -                        | +1.56  | +1.48 | +1.50 |
|                                     | H <sub>3</sub>        | -0.76 | -                        | -0.76  | -0.53 | -0.51 |
|                                     | H <sub>4</sub>        | -0.76 | -                        | -0.56  | -0.26 | -0.35 |
|                                     | H <sub>5</sub>        | -0.76 | -                        | -0.56  | -0.36 | -0.28 |
|                                     | H <sub>6</sub>        | -0.76 | -                        | -0.75  | -0.32 | -0.48 |
|                                     | Mg <sub>3</sub>       | +1.55 | -                        | +1.56  | +1.53 | +1.50 |
|                                     | Mg <sub>4</sub>       | +1.55 | -                        | +1.53  | +1.50 | +1.55 |
|                                     | H <sub>7</sub>        | -0.75 | -                        | -0.76  | -0.48 | -0.76 |
| H <sub>8</sub>                      | -0.76                 | -     | -0.75                    | -0.53  | -0.54 |       |
| Second layer<br>(MgH <sub>2</sub> ) | Mg <sub>8</sub>       | +1.56 | -                        | +1.58  | +1.55 | +1.55 |
| Co                                  | Co <sub>1</sub>       | -     | -4.60 × 10 <sup>-5</sup> | -0.32  | -0.05 | -0.26 |
|                                     | Co <sub>2</sub>       | -     | -                        | -      | -0.30 | -0.04 |
|                                     | Co <sub>3</sub>       | -     | -                        | -      | -0.21 | -0.03 |
|                                     | Co <sub>4</sub>       | -     | -                        | -      | -0.43 | -0.49 |
|                                     | Co <sub>5</sub>       | -     | -                        | -      | -0.37 | -0.32 |
|                                     | Co <sub>6</sub>       | -     | -                        | -      | -0.23 | -0.31 |
|                                     | Co <sub>7</sub>       | -     | -                        | -      | -0.12 | -0.24 |
|                                     | Co <sub>8</sub>       | -     | -                        | -      | -0.20 | -     |
|                                     | Co <sub>9</sub>       | -     | -                        | -      | -0.38 | -     |

Table S8. Bader ionic charges for CO<sub>2</sub> (C<sub>1</sub>, O<sub>1</sub> and O<sub>2</sub>), H<sub>2</sub> (H<sub>1</sub> and H<sub>2</sub>), Co (Co<sub>1</sub> - Co<sub>9</sub>) and surface (first and second MgH<sub>2</sub> layer, H<sub>1</sub> - H<sub>8</sub> and Mg<sub>1</sub> - Mg<sub>8</sub>) atoms after CO<sub>2</sub> / H<sub>2</sub> adsorption in configuration C3 CO<sub>2</sub> ||, 2 Co CO<sub>2</sub> ||, C2 CO<sub>2</sub> + 4 H<sub>2</sub> and 2 Co CO<sub>2</sub> + 4 H<sub>2</sub>.

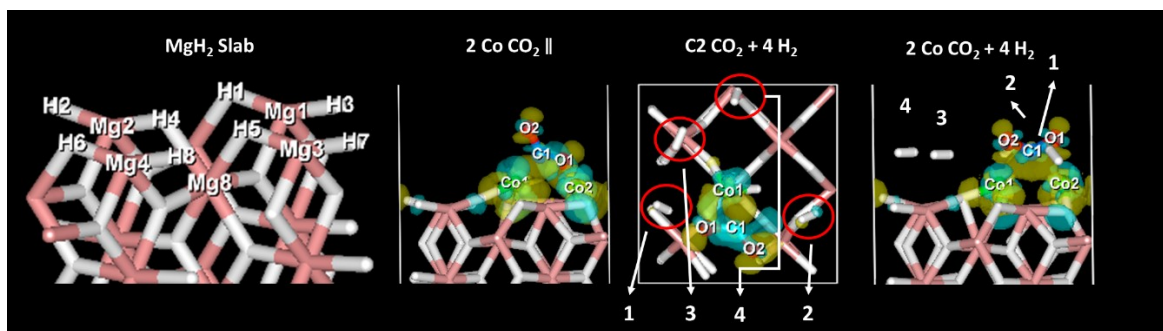

| Atom                                | MgH <sub>2</sub> Slab | H <sub>2</sub> | C3 CO <sub>2</sub> | 2 Co CO <sub>2</sub> | C2 CO <sub>2</sub> + 4 H <sub>2</sub> | 2 Co CO <sub>2</sub> + 4 H <sub>2</sub> |       |
|-------------------------------------|-----------------------|----------------|--------------------|----------------------|---------------------------------------|-----------------------------------------|-------|
| Ionic charge                        |                       |                |                    |                      |                                       |                                         |       |
| First layer<br>(MgH <sub>2</sub> )  | H <sub>1</sub>        | -0.76          | -                  | -0.78                | -0.63                                 | -0.75                                   | -0.60 |
|                                     | H <sub>2</sub>        | -0.75          | -                  | -0.79                | -0.75                                 | -0.76                                   | -0.75 |
|                                     | Mg <sub>1</sub>       | +1.55          | -                  | +1.56                | +1.55                                 | +1.59                                   | +1.57 |
|                                     | Mg <sub>2</sub>       | +1.55          | -                  | +1.55                | +1.55                                 | +1.61                                   | +1.58 |
|                                     | H <sub>3</sub>        | -0.76          | -                  | -0.76                | -0.75                                 | -0.75                                   | -0.75 |
|                                     | H <sub>4</sub>        | -0.76          | -                  | -0.79                | -0.64                                 | -0.40                                   | -0.61 |
|                                     | H <sub>5</sub>        | -0.76          | -                  | -0.65                | -0.51                                 | -0.59                                   | -0.55 |
|                                     | H <sub>6</sub>        | -0.76          | -                  | -0.36                | -0.77                                 | -0.75                                   | -0.75 |
|                                     | Mg <sub>3</sub>       | +1.55          | -                  | +1.51                | +1.60                                 | +1.56                                   | +1.55 |
|                                     | Mg <sub>4</sub>       | +1.55          | -                  | +1.60                | +1.53                                 | +1.55                                   | +1.55 |
|                                     | H <sub>7</sub>        | -0.75          | -                  | -0.79                | -0.75                                 | -0.76                                   | -0.75 |
| H <sub>8</sub>                      | -0.76                 | -              | -0.50              | -0.50                | -0.75                                 | -0.55                                   |       |
| Second layer<br>(MgH <sub>2</sub> ) | Mg <sub>8</sub>       | +1.56          | -                  | +1.59                | +1.57                                 | +1.57                                   | +1.57 |
| CO <sub>2</sub>                     | O <sub>1</sub>        | -              | -                  | -0.99                | -1.14                                 | -1.14                                   | -1.01 |
|                                     | O <sub>2</sub>        | -              | -                  | -1.16                | -1.03                                 | -1.15                                   | -1.02 |
|                                     | C <sub>1</sub>        | -              | -                  | +1.22                | +1.11                                 | +1.21                                   | +1.06 |
| Co                                  | Co <sub>1</sub>       | -              | -                  | +0.20                | -0.03                                 | +0.43                                   | +0.06 |
|                                     | Co <sub>2</sub>       | -              | -                  | -                    | +0.19                                 | -                                       | +0.10 |
| H <sub>2</sub>                      | H <sub>1</sub> (1)    | -              | +0.97              | -                    | -                                     | +1.00                                   | +0.97 |
|                                     | H <sub>2</sub> (1)    | -              | +1.03              | -                    | -                                     | +1.01                                   | +1.04 |
|                                     | H <sub>1</sub> (2)    | -              | -                  | -                    | -                                     | +0.95                                   | +0.94 |
|                                     | H <sub>2</sub> (2)    | -              | -                  | -                    | -                                     | +1.06                                   | +1.08 |
|                                     | H <sub>1</sub> (3)    | -              | -                  | -                    | -                                     | +1.06                                   | +1.01 |
|                                     | H <sub>2</sub> (3)    | -              | -                  | -                    | -                                     | +0.97                                   | +1.01 |
|                                     | H <sub>1</sub> (4)    | -              | -                  | -                    | -                                     | +0.99                                   | +1.03 |
|                                     | H <sub>2</sub> (4)    | -              | -                  | -                    | -                                     | +1.02                                   | +1.00 |

**Table S9** Valence Bader charges difference (charge before adsorption – charge after adsorption) for the CO<sub>2</sub> (C<sub>1</sub>, O<sub>1</sub> and O<sub>2</sub>) and the surface (first and second MgH<sub>2</sub> layer, H<sub>1</sub> – H<sub>8</sub> and Mg<sub>1</sub> – Mg<sub>8</sub>) atoms after the CO<sub>2</sub> adsorption in configuration P2, P7 and 4 CO<sub>2</sub>.

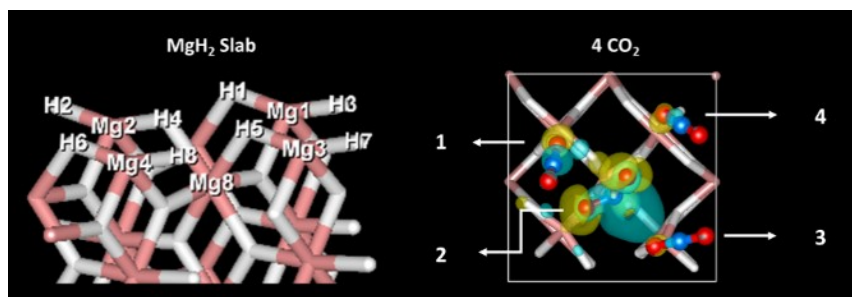

| Atom                                | 1 CO <sub>2</sub> P2 | 1 CO <sub>2</sub> P7 | 4 CO <sub>2</sub> |       |
|-------------------------------------|----------------------|----------------------|-------------------|-------|
|                                     | Charge difference    |                      |                   |       |
| First layer<br>(MgH <sub>2</sub> )  | H <sub>1</sub>       | 0.00                 | 0.00              | -0.01 |
|                                     | H <sub>2</sub>       | 0.00                 | 0.00              | -0.01 |
|                                     | Mg <sub>1</sub>      | -0.01                | +0.01             | -0.05 |
|                                     | Mg <sub>2</sub>      | 0.00                 | 0.00              | -0.02 |
|                                     | H <sub>3</sub>       | 0.00                 | -0.01             | +0.01 |
|                                     | H <sub>4</sub>       | -0.01                | 0.00              | -0.60 |
|                                     | H <sub>5</sub>       | -0.01                | 0.00              | -0.02 |
|                                     | H <sub>6</sub>       | 0.00                 | 0.00              | -0.02 |
| Second layer<br>(MgH <sub>2</sub> ) | Mg <sub>3</sub>      | 0.00                 | -0.02             | -0.04 |
|                                     | Mg <sub>4</sub>      | -0.01                | +0.01             | -0.03 |
| CO <sub>2</sub>                     | H <sub>7</sub>       | 0.00                 | 0.00              | 0.00  |
|                                     | H <sub>8</sub>       | 0.00                 | +0.01             | -0.01 |
|                                     | Mg <sub>8</sub>      | -0.01                | -0.01             | -0.01 |
|                                     | O <sub>1</sub> (1)   | +0.80                | +0.85             | +0.85 |
|                                     | O <sub>2</sub> (1)   | +0.76                | +0.79             | +0.73 |
|                                     | C <sub>1</sub> (1)   | -1.51                | -1.67             | -1.54 |
|                                     | O <sub>1</sub> (2)   | -                    | -                 | +0.90 |
|                                     | O <sub>2</sub> (2)   | -                    | -                 | +1.00 |
|                                     | C <sub>1</sub> (2)   | -                    | -                 | -1.12 |
|                                     | O <sub>1</sub> (3)   | -                    | -                 | +0.79 |
|                                     | O <sub>2</sub> (3)   | -                    | -                 | +0.87 |
|                                     | C <sub>1</sub> (3)   | -                    | -                 | -1.63 |
| O <sub>1</sub> (4)                  | -                    | -                    | +0.80             |       |
| O <sub>2</sub> (4)                  | -                    | -                    | +0.84             |       |
| C <sub>1</sub> (4)                  | -                    | -                    | -1.61             |       |

**Table S10** Valence Bader charges difference (charge before adsorption – charge after adsorption) for the Co (Co<sub>1</sub> - Co<sub>3</sub>) and the surface (first and second MgH<sub>2</sub> layer, H<sub>1</sub> – H<sub>8</sub> and Mg<sub>1</sub> – Mg<sub>8</sub>) atoms after the Co adsorption in configuration C2, 4/4 Co and 7 Co.

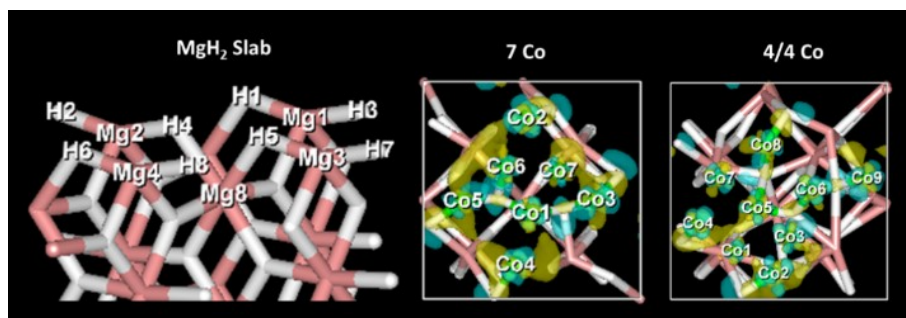

| Atom                                | 1 Co C2           | 4/4 Co | 7 Co  |       |
|-------------------------------------|-------------------|--------|-------|-------|
|                                     | Charge difference |        |       |       |
| First layer<br>(MgH <sub>2</sub> )  | H <sub>1</sub>    | 0.00   | -0.33 | -0.26 |
|                                     | H <sub>2</sub>    | +0.01  | +0.05 | +0.01 |
|                                     | Mg <sub>1</sub>   | +0.02  | +0.02 | +0.06 |
|                                     | Mg <sub>2</sub>   | -0.01  | +0.07 | +0.04 |
|                                     | H <sub>3</sub>    | 0.00   | -0.23 | -0.25 |
|                                     | H <sub>4</sub>    | -0.20  | -0.50 | -0.41 |
|                                     | H <sub>5</sub>    | -0.20  | -0.40 | -0.47 |
|                                     | H <sub>6</sub>    | 0.00   | -0.43 | -0.28 |
| Second layer<br>(MgH <sub>2</sub> ) | Mg <sub>3</sub>   | -0.01  | +0.02 | +0.05 |
|                                     | Mg <sub>4</sub>   | +0.02  | +0.05 | 0.00  |
| Co                                  | H <sub>7</sub>    | +0.01  | -0.28 | 0.00  |
|                                     | H <sub>8</sub>    | 0.00   | -0.22 | -0.22 |
|                                     | Co <sub>1</sub>   | +0.32  | +0.05 | +0.26 |
|                                     | Co <sub>2</sub>   | -      | +0.30 | +0.04 |
|                                     | Co <sub>3</sub>   | -      | +0.21 | +0.03 |
|                                     | Co <sub>4</sub>   | -      | +0.43 | +0.49 |
|                                     | Co <sub>5</sub>   | -      | +0.37 | +0.32 |
|                                     | Co <sub>6</sub>   | -      | +0.23 | +0.31 |
|                                     | Co <sub>7</sub>   | -      | +0.12 | +0.24 |
| Co <sub>8</sub>                     | -                 | +0.20  | -     |       |
| Co <sub>9</sub>                     | -                 | +0.38  | -     |       |

**Table S11** Valence Bader charges difference (charge before adsorption – charge after adsorption) for the CO<sub>2</sub> (C<sub>1</sub>, O<sub>1</sub> and O<sub>2</sub>), the H<sub>2</sub> (H<sub>1</sub> and H<sub>2</sub>), the Co (Co<sub>1</sub> – Co<sub>9</sub>) and the surface (first and second MgH<sub>2</sub> layer, H<sub>1</sub> – H<sub>8</sub> and Mg<sub>1</sub> – Mg<sub>8</sub>) atoms after the CO<sub>2</sub> / H<sub>2</sub> adsorption in configuration C3 CO<sub>2</sub> ||, 2 Co CO<sub>2</sub> ||, C2 CO<sub>2</sub> + 4 H<sub>2</sub> and 2 Co CO<sub>2</sub> + 4 H<sub>2</sub>.



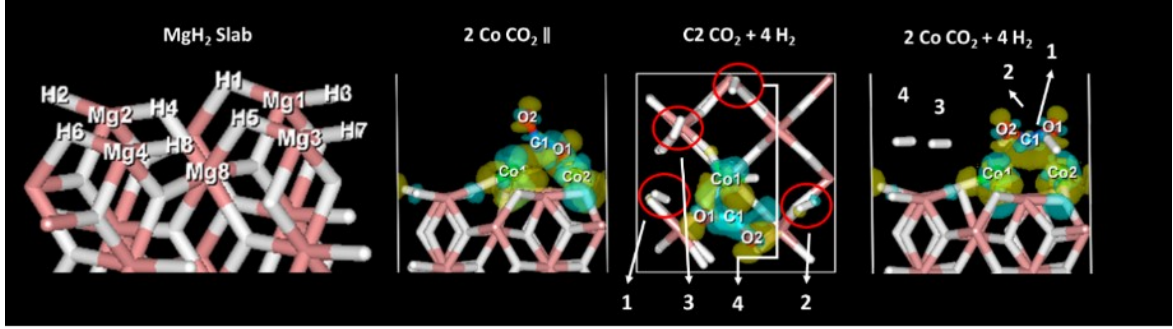

| Atom                                | Charge difference  |                      |                                       |                                         |       |
|-------------------------------------|--------------------|----------------------|---------------------------------------|-----------------------------------------|-------|
|                                     | C3 CO <sub>2</sub> | 2 Co CO <sub>2</sub> | C2 CO <sub>2</sub> + 4 H <sub>2</sub> | 2 Co CO <sub>2</sub> + 4 H <sub>2</sub> |       |
| First layer<br>(MgH <sub>2</sub> )  | H <sub>1</sub>     | +0.02                | -0.13                                 | -0.01                                   | -0.16 |
|                                     | H <sub>2</sub>     | +0.04                | -0.01                                 | 0.00                                    | -0.01 |
|                                     | Mg <sub>1</sub>    | -0.01                | 0.00                                  | -0.04                                   | -0.03 |
|                                     | Mg <sub>2</sub>    | -0.01                | 0.00                                  | -0.06                                   | -0.03 |
|                                     | H <sub>3</sub>     | 0.00                 | 0.00                                  | -0.01                                   | 0.00  |
|                                     | H <sub>4</sub>     | +0.04                | -0.12                                 | -0.36                                   | -0.15 |
|                                     | H <sub>5</sub>     | -0.11                | -0.25                                 | -0.17                                   | -0.21 |
|                                     | H <sub>6</sub>     | -0.39                | +0.01                                 | 0.00                                    | 0.00  |
|                                     | Mg <sub>3</sub>    | +0.04                | -0.05                                 | -0.01                                   | 0.00  |
|                                     | Mg <sub>4</sub>    | -0.06                | +0.02                                 | 0.00                                    | -0.01 |
| Second layer<br>(MgH <sub>2</sub> ) | H <sub>7</sub>     | +0.03                | -0.01                                 | 0.00                                    | 0.00  |
|                                     | H <sub>8</sub>     | -0.26                | -0.25                                 | 0.00                                    | -0.20 |
| CO <sub>2</sub>                     | Mg <sub>8</sub>    | -0.03                | -0.01                                 | -0.01                                   | -0.01 |
|                                     | O <sub>1</sub>     | +0.77                | +0.93                                 | +0.92                                   | +0.79 |
|                                     | O <sub>2</sub>     | +0.94                | +0.81                                 | +0.93                                   | +0.79 |
| Co                                  | C <sub>1</sub>     | -0.78                | -0.67                                 | -0.77                                   | -0.62 |
|                                     | Co <sub>1</sub>    | -0.20                | +0.03                                 | -0.43                                   | -0.06 |
|                                     | Co <sub>2</sub>    | -                    | -0.19                                 | -                                       | -0.10 |
| H <sub>2</sub>                      | H <sub>1</sub> (1) | -                    | -                                     | +0.03                                   | 0.00  |
|                                     | H <sub>2</sub> (1) | -                    | -                                     | -0.02                                   | +0.02 |
|                                     | H <sub>1</sub> (2) | -                    | -                                     | -0.02                                   | -0.03 |
|                                     | H <sub>2</sub> (2) | -                    | -                                     | +0.03                                   | +0.05 |
|                                     | H <sub>1</sub> (3) | -                    | -                                     | +0.09                                   | +0.03 |
|                                     | H <sub>2</sub> (3) | -                    | -                                     | -0.06                                   | -0.02 |
|                                     | H <sub>1</sub> (4) | -                    | -                                     | +0.01                                   | +0.05 |
|                                     | H <sub>2</sub> (4) | -                    | -                                     | -0.01                                   | -0.03 |

Table S12: *k*-points grid convergence set for MgH<sub>2</sub> clean systems. For this test, a 2×2 supercell has been employed.

| <i>k</i> -points grid | <i>E</i> <sub>sys</sub> (Ry) |
|-----------------------|------------------------------|
|-----------------------|------------------------------|

---

|          |          |
|----------|----------|
| 4×4×4    | -71.9781 |
| 5×5×5    | -71.9797 |
| 6×6×6    | -71.9801 |
| 8×8×8    | -71.9800 |
| 12×12×12 | -71.9800 |
| 16×16×16 | -71.9800 |
| 20×20×20 | -71.9800 |
| 24×24×24 | -71.9800 |
| 28×28×28 | -71.9800 |

---

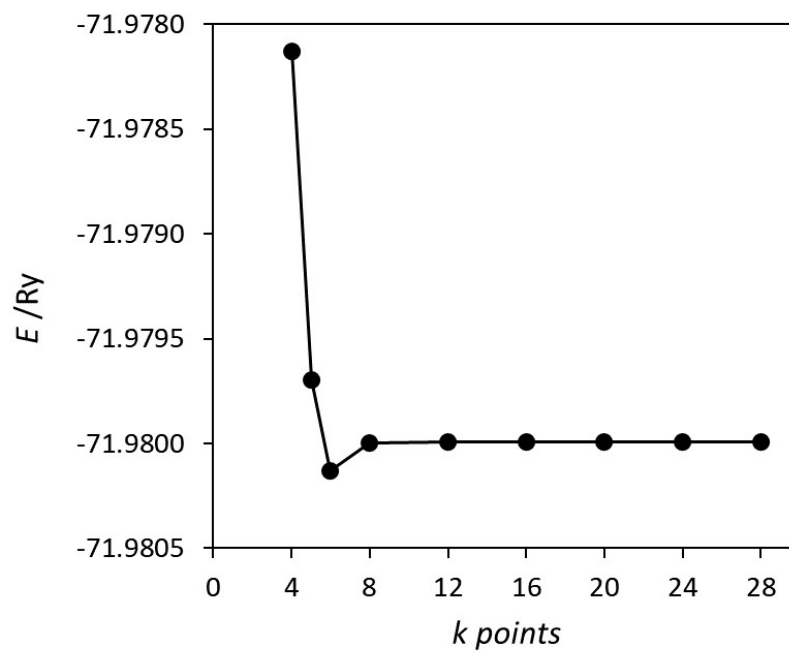

Figure S9. Surface energy for MgH2 clean structure as a function of the  $k$ -points grid.
